# Supplementary material for: Host–microbiota interaction induces bi-phasic inflammation and glucose intolerance in mice
Source: PubMed Central journal article supplement (PMC5681278; doi:10.1016/j.molmet.2017.08.016), 2017-09-21

Supplementary figure 1

A

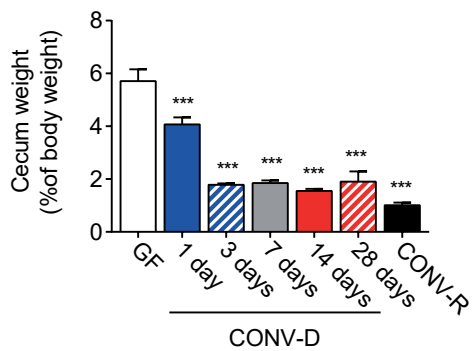

B

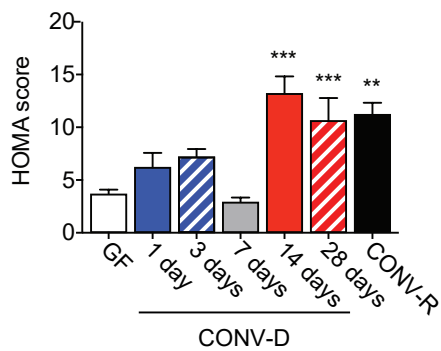

C

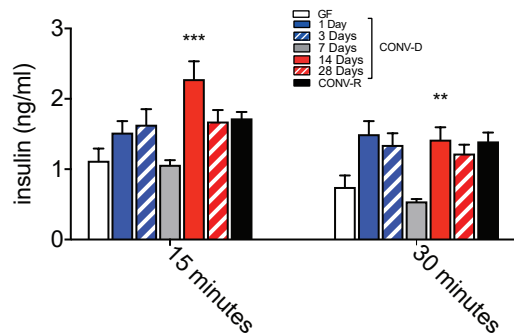

D

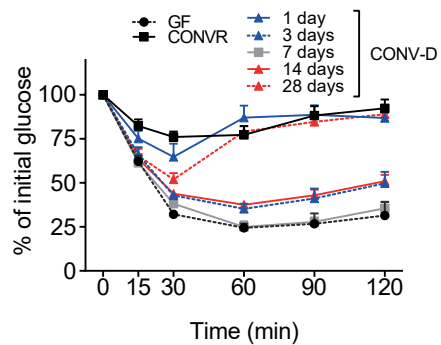

E

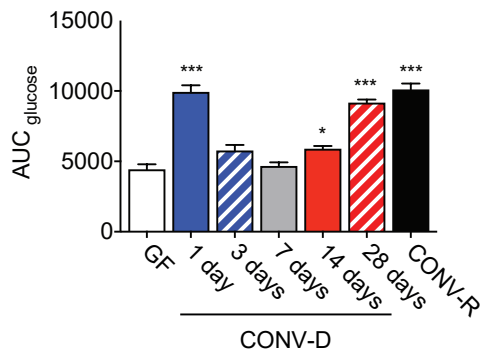

Supplement: mmc2.pdf [file mmc2.pdf]
