# Supplementary material for: Host–microbiota interaction induces bi-phasic inflammation and glucose intolerance in mice
Source: PubMed Central journal article supplement (PMC5681278; doi:10.1016/j.molmet.2017.08.016), 2017-09-21

# Supplementary Figure 3

A

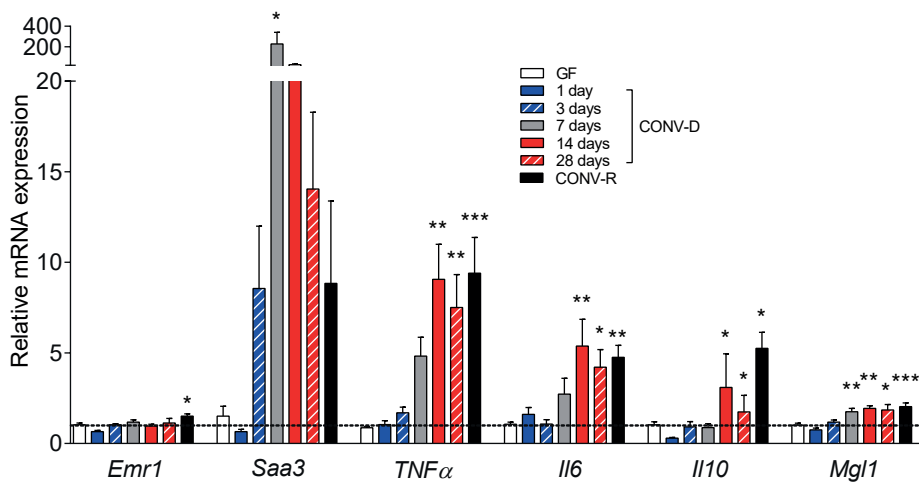

Supplement: mmc4.pdf [file mmc4.pdf]
